# Supplementary material
Source: publisher figshare collection journal article supplement (https://diabetesjournals.figshare.com/articles/dataset/_/23553357)
Supplement: Supplementary file 1 [file 1]

## Online Supplementary Table 1

### Mass spectrometry identification of adipocyte lipolytic secretome proteins

| Protein name                                            | Protein accession numbers/name       | Protein molecular weight (Da) | Unique peptide counts | Unique spectra | Total spectrum counts | Percentage sequence coverage |
|---------------------------------------------------------|--------------------------------------|-------------------------------|-----------------------|----------------|-----------------------|------------------------------|
| Plectin 7                                               | Q6S388                               | 513,756.00                    | 0                     | 0              | 3                     | 0.78%                        |
| T-complex protein 1 subunit alpha                       | TCPA                                 | 60,449.90                     | 3                     | 3              | 3                     | 5.04%                        |
| Presequence protease                                    | PREP                                 | 117,374.40                    | 2                     | 3              | 4                     | 2.61%                        |
| 14-3-3 protein epsilon                                  | 1433E, Q8BPH1                        | 29,189.90                     | 3                     | 5              | 15                    | 21.20%                       |
| Beta-enolase                                            | ENOB, Q4FK59                         | 46,998.80                     | 1                     | 1              | 2                     | 6.45%                        |
| Uncharacterized protein                                 | Q3TXS9                               | 31,189.20                     | 1                     | 1              | 3                     | 11.60%                       |
| 26S proteasome regulatory subunit 7                     | PRS7, Q3UIH5, Q8BVQ9                 | 48,679.60                     | 2                     | 2              | 2                     | 4.62%                        |
| Fructose-bisphosphate aldolase A (Muscle-type aldolase) | P00883.2                             | 39,343.40                     | 0                     | 0              | 17                    | 25.30%                       |
| D-3-phosphoglycerate dehydrogenase                      | SERA                                 | 56,585.20                     | 5                     | 5              | 5                     | 10.10%                       |
| Collagen alpha-2(I) chain                               | CO1A2, Q3TU64, Q3TUE2                | 129,597.30                    | 2                     | 2              | 3                     | 2.04%                        |
| Serine/threonine-protein phosphatase 2A activator       | PTPA                                 | 36,710.50                     | 2                     | 2              | 2                     | 7.43%                        |
| Heat shock cognate 71 kDa protein                       | HSP7C, Q3TH56, Q3UBA6                | 70,873.60                     | 12                    | 18             | 34                    | 25.70%                       |
| Enoyl-CoA delta isomerase 1                             | ECI1                                 | 32,251.50                     | 1                     | 1              | 6                     | 13.80%                       |
| Aspartate aminotransferase                              | AATM                                 | 47,412.30                     | 9                     | 10             | 11                    | 22.10%                       |
| Uncharacterized protein                                 | Q3TGK7                               | 46,141.30                     | 1                     | 1              | 2                     | 5.67%                        |
| 3-hydroxyisobutyryl-CoA hydrolase                       | HIBCH                                | 43,039.40                     | 2                     | 2              | 5                     | 11.20%                       |
| Rho GDP-dissociation inhibitor 1                        | GDIR1                                | 23,408.00                     | 2                     | 2              | 2                     | 13.70%                       |
| Chaperonin subunit 2 (Beta)                             | Q542X7                               | 57,478.80                     | 2                     | 2              | 4                     | 10.30%                       |
| L-lactate dehydrogenase B chain                         | LDHB                                 | 36,572.40                     | 2                     | 2              | 5                     | 15.00%                       |
| 40S ribosomal protein S30                               | Q3THB2, Q642K5, Q91V99, Q920W8, RS30 | 6,647.90                      | 2                     | 3              | 3                     | 8.27%                        |
| Phosphoglycerate mutase                                 | Q3U7Z6                               | 28,832.80                     | 6                     | 9              | 23                    | 15.40%                       |
| Annexin                                                 | Q542G9, Q9CZI7                       | 38,610.90                     | 5                     | 5              | 5                     | 19.20%                       |
| Cytoplasmic dynein 1 light intermediate chain 1         | DC1L1                                | 56,615.40                     | 2                     | 2              | 2                     | 5.16%                        |
| Probable ATP-dependent RNA helicase DDX17               | DDX17, Q3U741                        | 72,586.30                     | 1                     | 1              | 2                     | 4.00%                        |
| Aminopeptidase B                                        | AMPB, E9PYF1, Q8BMH2                 | 68,004.10                     | 3                     | 3              | 5                     | 5.23%                        |
| Uncharacterized protein                                 | Q3U6X2                               | 51,065.80                     | 0                     | 0              | 12                    | 9.37%                        |
| 60 kDa heat shock protein                               | CH60                                 | 60,956.80                     | 11                    | 13             | 19                    | 20.20%                       |
| H2-K region expressed gene 6, isoform CRA               | A0A068BEQ2, DHB8                     | 26,587.30                     | 3                     | 3              | 3                     | 15.40%                       |
| Phosphoglycerate kinase 1                               | PGK1                                 | 44,551.10                     | 9                     | 11             | 51                    | 35.30%                       |

|                                                              |                               |            |   |    |    |        |
|--------------------------------------------------------------|-------------------------------|------------|---|----|----|--------|
| Ubiquitin carboxyl-terminal hydrolase                        | A0A2I3BQ39, Q8BWQ9, UCHL3     | 29,702.00  | 0 | 0  | 3  | 10.90% |
| EH domain-containing protein 2                               | EHD2                          | 61,176.40  | 2 | 2  | 2  | 4.24%  |
| Uncharacterized protein                                      | Q3TCL2, Q3UDY1, Q5U415        | 35,052.00  | 3 | 3  | 6  | 9.03%  |
| Peroxiredoxin-6                                              | D3Z0Y2, PRDX6, Q6A0D0, Q6GT24 | 22,495.10  | 4 | 4  | 5  | 25.00% |
| GTP-binding nuclear protein Ran                              | Q14AA6, Q3ULW0, RAN           | 24,357.30  | 3 | 3  | 5  | 13.40% |
| Acetoacetyl-CoA synthetase                                   | AACS                          | 75,201.20  | 2 | 2  | 2  | 3.12%  |
| Histone H4                                                   | H4                            | 11,367.70  | 3 | 4  | 6  | 33.00% |
| Receptor of activated protein C kinase 1                     | RACK1                         | 35,077.00  | 3 | 3  | 3  | 7.89%  |
| Adenylate kinase 2                                           | F7BP55                        | 7,393.00   | 1 | 1  | 14 | 54.20% |
| Vinculin                                                     | VINC                          | 116,719.40 | 6 | 7  | 8  | 5.72%  |
| Carbonyl reductase [NADPH] 3                                 | CBR3                          | 30,953.50  | 2 | 2  | 2  | 9.03%  |
| Heat shock protein 1 (Chaperonin 10)                         | Q4KL76                        | 10,962.80  | 8 | 13 | 24 | 66.70% |
| 40S ribosomal protein S8                                     | Q5M9L9, RS8                   | 24,264.40  | 2 | 2  | 4  | 12.00% |
| Heat shock 70 kDa protein 4                                  | HSP74, Q3U2G2, Q571M2, Q99L75 | 94,209.50  | 2 | 2  | 2  | 2.62%  |
| Uncharacterized protein                                      | Q3TDE6                        | 70,395.50  | 4 | 4  | 5  | 7.50%  |
| Nucleoside diphosphate kinase                                | E9PZF0, NDKB                  | 30,200.40  | 1 | 1  | 13 | 17.60% |
| Uncharacterized protein                                      | Q3UD67                        | 106,880.90 | 5 | 5  | 5  | 6.92%  |
| Uncharacterized protein                                      | Q3TMD2, Q3TWG9, Q8BV87, SERPH | 46,520.90  | 3 | 3  | 5  | 7.67%  |
| Carbonyl reductase 1, isoform CRA                            | B2RXY7                        | 30,641.40  | 5 | 5  | 13 | 18.40% |
| RBR-type E3 ubiquitin transferase                            | A0A0A6YXB0                    | 36,220.20  | 1 | 1  | 3  | 7.55%  |
| 60S ribosomal protein L6                                     | Q3UFI4, RL6                   | 33,529.90  | 4 | 4  | 5  | 12.20% |
| T-complex protein 1 subunit gamma                            | Q3U4U6, Q3UJP4                | 60,603.00  | 3 | 3  | 4  | 6.24%  |
| Collagen, type VI, alpha 3                                   | E9PWQ3                        | 353,931.50 | 0 | 0  | 2  | 0.79%  |
| Coronin-1B                                                   | COR1B                         | 53,912.20  | 2 | 2  | 2  | 4.75%  |
| Uncharacterized protein                                      | Q3UAX1                        | 53,558.60  | 0 | 0  | 37 | 30.00% |
| Major vault protein                                          | MVP                           | 95,924.10  | 3 | 3  | 3  | 3.48%  |
| Myosin-11                                                    | A0A2R8VHF9, E9QPE7, Q69ZX3    | 228,274.00 | 1 | 1  | 2  | 1.44%  |
| Prolyl endopeptidase                                         | PPCE, Q3TCS0, Q8C6A3          | 82,800.30  | 2 | 2  | 3  | 3.66%  |
| Ptms protein                                                 | Q66JR8                        | 23,158.10  | 1 | 1  | 7  | 9.00%  |
| 14-3-3 protein zeta/delta                                    | A0A2I3BQ03                    | 19,064.80  | 5 | 5  | 6  | 33.70% |
| Phosphoserine aminotransferase                               | Q3ULZ3, Q543K5, Q8BTJ1        | 40,473.70  | 4 | 4  | 5  | 11.90% |
| NADH dehydrogenase [ubiquinone] flavoprotein 3               | Q3U422, Q3U4K3                | 49,891.30  | 2 | 2  | 2  | 4.70%  |
| Enoyl-CoA hydratase                                          | ECHM                          | 31,475.30  | 5 | 5  | 6  | 16.90% |
| Serine (or cysteine) peptidase inhibitor, clade B, member 6a | F8WIV2, Q3U3L3, Q4FJQ6        | 44,775.60  | 2 | 2  | 2  | 4.51%  |

|                                                                  |                            |            |   |    |    |        |
|------------------------------------------------------------------|----------------------------|------------|---|----|----|--------|
| Electron transfer flavoprotein subunit beta                      | ETFB                       | 27,623.20  | 3 | 3  | 5  | 14.90% |
| GTP:AMP phosphotransferase AK3                                   | KAD3                       | 25,426.90  | 3 | 3  | 3  | 11.50% |
| Elongation factor 1-alpha                                        | Q3UZQ3                     | 50,066.00  | 1 | 1  | 16 | 13.40% |
| Medium-chain specific acyl-CoA dehydrogenase                     | ACADM, Q91WS8              | 46,438.30  | 2 | 2  | 3  | 6.18%  |
| Uncharacterized protein                                          | Q3TK73                     | 31,391.60  | 0 | 0  | 2  | 8.15%  |
| Glycerol-3-phosphate dehydrogenase [NAD(+)]                      | GPDA                       | 37,572.70  | 9 | 10 | 20 | 24.40% |
| Alpha actinin 1a                                                 | A1BN54                     | 102,723.90 | 0 | 0  | 4  | 4.28%  |
| Proteasome subunit alpha type-5                                  | PSA5, Q3TUI9, Q3TUX3       | 26,397.30  | 3 | 3  | 5  | 11.60% |
| Methylmalonate-semialdehyde dehydrogenase [acylating]            | MMSA                       | 57,916.30  | 5 | 5  | 7  | 11.60% |
| Plectin                                                          | PLEC                       | 534,181.10 | 0 | 0  | 3  | 0.75%  |
| Proteasome subunit beta type-6                                   | PSB6                       | 25,378.90  | 3 | 3  | 4  | 12.60% |
| Fatty acid binding protein 5                                     | Q497I3                     | 15,137.30  | 0 | 0  | 2  | 15.60% |
| Non-specific lipid-transfer protein                              | NLTP                       | 59,126.30  | 2 | 2  | 2  | 3.84%  |
| Poly(rC)-binding protein 1                                       | PCBP1                      | 37,498.20  | 1 | 1  | 6  | 11.80% |
| Splicing factor, proline- and glutamine-rich                     | SFPQ                       | 75,441.90  | 2 | 2  | 3  | 4.86%  |
| Dihydropyrimidinase-related protein 2                            | DPYL2                      | 62,277.90  | 2 | 2  | 3  | 3.67%  |
| Ribosomal protein S14                                            | O70569, RS14               | 16,300.90  | 4 | 4  | 6  | 19.90% |
| Proteasome subunit beta type                                     | Q6RI64                     | 26,373.00  | 2 | 3  | 3  | 10.00% |
| Uncharacterized protein                                          | Q8BRW2                     | 26,751.30  | 3 | 3  | 8  | 8.91%  |
| RuvB-like helicase                                               | Q3U1C2, Q3UJN2             | 50,215.30  | 2 | 2  | 2  | 5.48%  |
| Apoptosis-inducing factor 1                                      | AIFM1                      | 66,766.10  | 6 | 6  | 6  | 9.80%  |
| Tubulin beta-5 chain                                             | TBB5                       | 49,670.60  | 0 | 0  | 5  | 10.60% |
| Haloacid dehalogenase-like hydrolase domain-containing protein 3 | HDHD3                      | 28,027.00  | 2 | 2  | 4  | 11.60% |
| Glutamate dehydrogenase 1                                        | DHE3                       | 61,338.40  | 1 | 1  | 9  | 12.70% |
| Diazepam binding inhibitor                                       | Q548W7                     | 10,000.80  | 3 | 7  | 20 | 34.50% |
| Heterogeneous nuclear ribonucleoprotein M                        | B8JK32, B8JK33             | 68,163.20  | 0 | 0  | 2  | 3.39%  |
| Adenosylhomocysteinase                                           | Q3TF14, Q3U4D1, Q3U5U5     | 47,704.00  | 3 | 3  | 3  | 8.56%  |
| Uncharacterized protein                                          | Q3TFD9, Q3U6S1, Q5FWJ3     | 53,689.80  | 1 | 2  | 39 | 32.80% |
| T-complex protein 1 subunit delta                                | Q3TII0, TCPD               | 58,085.80  | 2 | 3  | 3  | 4.27%  |
| Alpha-actinin-4                                                  | A0A1L1SV25, Q3UDJ7, Q3ULT2 | 104,999.40 | 1 | 1  | 6  | 7.08%  |
| Stress-70 protein                                                | GRP75                      | 73,462.10  | 7 | 8  | 9  | 14.10% |
| Ribosomal protein S23                                            | Q497E1, Q9CWI9, RS23       | 15,808.60  | 1 | 1  | 6  | 23.80% |
| Glutamyl-prolyl-tRNA synthetase                                  | B9EIU1                     | 169,964.20 | 4 | 4  | 4  | 3.37%  |

|                                                      |                                              |            |    |    |    |        |
|------------------------------------------------------|----------------------------------------------|------------|----|----|----|--------|
| Fructose-bisphosphate aldolase                       | A6ZI46, Q9CPQ9                               | 45,344.20  | 0  | 0  | 11 | 16.90% |
| 6-phosphogluconolactonase                            | 6PGL                                         | 27,255.30  | 4  | 5  | 11 | 17.10% |
| Gamma actin-like protein                             | Q9QZ83                                       | 43,601.80  | 0  | 0  | 27 | 20.90% |
| Uncharacterized protein (Fragment)                   | Q3UEA1                                       | 113,050.30 | 3  | 3  | 5  | 3.87%  |
| 14-3-3 protein beta/alpha                            | 1433B                                        | 28,087.20  | 4  | 5  | 14 | 25.60% |
| Ubiquitin carboxyl-terminal hydrolase                | Q3U4W8, UBP5                                 | 93,356.40  | 2  | 2  | 3  | 3.47%  |
| Spectrin beta chain, non-erythrocytic 1              | SPTB2                                        | 274,227.90 | 2  | 2  | 2  | 0.93%  |
| Uncharacterized protein                              | Q3UBI6, RL7                                  | 31,352.50  | 1  | 1  | 5  | 12.20% |
| Glutathione S-transferase Mu 1                       | A2AE89, GSTM1                                | 25,971.90  | 1  | 1  | 3  | 9.43%  |
| Protein disulfide-isomerase A6                       | PDIA6, Q3THH1                                | 48,658.10  | 3  | 3  | 3  | 9.77%  |
| Endoplasmic reticulum chaperone BiP                  | BIP, Q3TI47, Q3TKF8, Q3TWF2, Q3U9G2          | 72,464.70  | 8  | 8  | 10 | 15.70% |
| 3-ketoacyl-CoA thiolase A                            | H3BKL5, Q3UPU8, THIKA                        | 43,997.20  | 2  | 2  | 2  | 7.51%  |
| Fatty acid synthase                                  | FAS                                          | 272,429.30 | 22 | 28 | 40 | 10.30% |
| 14-3-3 protein gamma subtype                         | A8IP69                                       | 28,303.10  | 2  | 3  | 10 | 14.20% |
| Sepiapterin reductase                                | G3UXX3, Q91XH5, SPRE                         | 23,357.50  | 2  | 2  | 2  | 13.20% |
| Elongation factor 1-delta                            | F6ZFU0                                       | 61,392.10  | 0  | 0  | 2  | 4.53%  |
| Uncharacterized protein                              | Q3TNN6, Q99LB4                               | 38,715.70  | 2  | 2  | 2  | 7.45%  |
| Polyadenylate-binding protein                        | Q8BN32                                       | 70,670.40  | 0  | 0  | 2  | 3.93%  |
| 6-phosphogluconate dehydrogenase, decarboxylating    | 6PGD, Q3UAG2, Q91V28                         | 53,262.90  | 3  | 3  | 4  | 8.70%  |
| Short/branched chain specific acyl-CoA dehydrogenase | ACDSB, E9Q5L3, Q7TMY2                        | 51,854.80  | 3  | 3  | 3  | 9.03%  |
| Laminin receptor (Fragment)                          | B2CY77, RSSA                                 | 32,838.10  | 3  | 3  | 5  | 12.90% |
| Heterogeneous nuclear ribonucleoproteins A2/B1       | ROA2                                         | 37,403.30  | 6  | 8  | 12 | 21.50% |
| Cytoplasmic aconitate hydratase                      | ACOC, Q8VDC3                                 | 99,104.40  | 4  | 4  | 5  | 6.52%  |
| Ribosome-binding protein 1                           | RRBP1                                        | 172,876.90 | 0  | 0  | 4  | 2.93%  |
| 40S ribosomal protein S21                            | RS21                                         | 9,141.60   | 3  | 4  | 4  | 34.90% |
| Keratin, type II cytoskeletal 1                      | P04264.5                                     | 66,019.20  | 2  | 2  | 4  | 5.75%  |
| Heat shock protein 90kDa beta (Grp94)                | Q3UAD6, Q3UBU0, Q91V38                       | 92,492.60  | 1  | 1  | 8  | 7.36%  |
| Thioredoxin-dependent peroxide reductase             | PRDX3                                        | 28,127.00  | 1  | 2  | 8  | 8.95%  |
| Non-POU domain-containing octamer-binding protein    | NONO, Q3TF40, Q3TFC2, Q3TMM5, Q3TTV7, Q3UM20 | 54,506.90  | 2  | 2  | 3  | 5.50%  |
| Uncharacterized protein                              | Q9CWK0                                       | 26,317.30  | 1  | 1  | 4  | 9.69%  |
| Glutathione S-transferase A4                         | GSTA4                                        | 25,565.20  | 2  | 3  | 5  | 9.46%  |
| Tubulin beta chain                                   | Q9CVR0                                       | 32,258.50  | 1  | 2  | 5  | 12.40% |
| Isovaleryl-CoA dehydrogenase                         | IVD                                          | 46,326.50  | 5  | 5  | 6  | 12.00% |

|                                                      |                                           |            |    |    |    |        |
|------------------------------------------------------|-------------------------------------------|------------|----|----|----|--------|
| 40S ribosomal protein S5                             | D3YYM6, D3Z1S8, Q91V55, RS5               | 22,877.00  | 4  | 4  | 4  | 11.00% |
| Elongation factor 1-delta                            | A0A0R4J1E2                                | 72,930.20  | 0  | 0  | 2  | 3.79%  |
| Hydroxyacyl-coenzyme A dehydrogenase                 | HCDH                                      | 34,464.70  | 3  | 3  | 3  | 12.10% |
| Keratin, type I cytoskeletal 10                      | P13645.4                                  | 59,512.40  | 2  | 2  | 4  | 7.25%  |
| Peroxisomal multifunctional enzyme type 2            | DHB4, Q3TT11, Q3UHW2                      | 79,424.70  | 2  | 2  | 2  | 3.81%  |
| Heat shock protein 1-like protein                    | B2CSK2, HS71L                             | 70,609.30  | 1  | 1  | 6  | 6.24%  |
| Malate dehydrogenase                                 | MDHM                                      | 35,611.90  | 9  | 13 | 36 | 37.90% |
| Uncharacterized protein                              | Q3U9Q3                                    | 49,882.40  | 0  | 0  | 12 | 9.56%  |
| Branched-chain-amino-acid aminotransferase           | A0A1B0GX27, Q3ULU3                        | 43,493.90  | 3  | 3  | 4  | 7.99%  |
| Caveolae-associated protein 1                        | CAVN1                                     | 43,953.70  | 3  | 4  | 4  | 8.93%  |
| Eukaryotic translation initiation factor 3 subunit I | EIF3I                                     | 36,460.90  | 2  | 2  | 2  | 4.00%  |
| 40S ribosomal protein S11                            | A0A1B0GRR3, Q9DB79, RS11                  | 19,415.20  | 3  | 3  | 3  | 16.90% |
| Uncharacterized protein                              | Q3UKH3, THIM                              | 41,829.20  | 4  | 4  | 4  | 12.10% |
| Dihydrolipoyl dehydrogenase                          | DLDH, Q3TIE8                              | 54,598.60  | 6  | 6  | 6  | 11.80% |
| Keratin, type II cytoskeletal 8                      | K2C8                                      | 54,567.00  | 2  | 2  | 3  | 6.94%  |
| Acetyl-CoA acetyltransferase                         | THIC                                      | 41,296.80  | 3  | 3  | 4  | 9.32%  |
| Glyceraldehyde-3-phosphate dehydrogenase             | A0A0A0MQF6, G3P                           | 38,653.70  | 5  | 6  | 10 | 16.20% |
| Carnitine O-acetyltransferase                        | CACP, H7BX88                              | 68,646.10  | 4  | 5  | 8  | 12.30% |
| D-dopachrome tautomerase                             | Q3UNI8                                    | 13,077.60  | 1  | 1  | 3  | 23.70% |
| Uncharacterized protein                              | A0A1S6GWJ8, HNRPM, Q3THB3, Q3TW40, Q570Z0 | 75,183.40  | 0  | 0  | 2  | 2.84%  |
| Proteasome subunit alpha type-2                      | PSA2, Q3UWT6, Q9CZ58                      | 27,509.70  | 3  | 3  | 5  | 15.00% |
| S-formylglutathione hydrolase                        | ESTD, H3BJL6, H3BK43, H3BKH6, H3BLJ9      | 28,554.20  | 2  | 2  | 3  | 11.30% |
| Rpl23a protein                                       | Q4V9X9, Q91YK6, RL23A                     | 16,941.10  | 3  | 3  | 4  | 21.90% |
| Isocitrate dehydrogenase [NAD] subunit               | A0A1L1STE6, IDH3A                         | 41,520.50  | 3  | 4  | 5  | 7.29%  |
| Procollagen-lysine,2-oxoglutarate 5-dioxygenase 3    | PLOD3                                     | 84,923.70  | 2  | 2  | 2  | 3.24%  |
| Alcohol dehydrogenase [NADP(+)]                      | AK1A1, Q3UJW9                             | 36,615.20  | 6  | 6  | 8  | 20.30% |
| Elongation factor 1-gamma                            | EF1G                                      | 50,061.30  | 4  | 5  | 8  | 8.47%  |
| Prelamin-A/C                                         | LMNA                                      | 74,238.90  | 9  | 10 | 11 | 16.10% |
| Uncharacterized protein                              | Q3TLH6                                    | 14,415.30  | 0  | 0  | 2  | 16.20% |
| Pyruvate carboxylase                                 | E9QPD7, G5E8R3, PYC                       | 129,701.90 | 22 | 27 | 43 | 19.60% |
| Cysteine sulfinic acid decarboxylase                 | CSAD                                      | 55,145.40  | 2  | 2  | 3  | 4.46%  |
| Cytosolic non-specific dipeptidase                   | CNDP2                                     | 52,768.20  | 4  | 5  | 5  | 6.95%  |

|                                                                            |                                                             |            |    |    |    |        |
|----------------------------------------------------------------------------|-------------------------------------------------------------|------------|----|----|----|--------|
| Bifunctional epoxide hydrolase 2                                           | HYES, Q3UQ71                                                | 62,544.90  | 2  | 2  | 2  | 3.79%  |
| Glycine--tRNA ligase                                                       | GARS                                                        | 81,879.10  | 2  | 2  | 3  | 3.98%  |
| L-xylulose reductase                                                       | DCXR                                                        | 25,745.40  | 2  | 2  | 2  | 11.10% |
| Alpha-1,4 glucan phosphorylase                                             | Q3TFQ8                                                      | 96,704.40  | 2  | 2  | 2  | 1.54%  |
| Aldehyde dehydrogenase                                                     | A0A0G2JEU1,<br>Q3TVM2, Q3U6I3,<br>Q3U9J7, Q3UJW1,<br>Q544B1 | 56,595.60  | 2  | 2  | 2  | 4.88%  |
| 60S ribosomal protein L4                                                   | RL4                                                         | 47,155.30  | 4  | 8  | 11 | 10.70% |
| Protein disulfide-isomerase A3                                             | PDIA3                                                       | 56,680.40  | 7  | 9  | 13 | 14.10% |
| MCG126220                                                                  | A3KML3                                                      | 27,779.40  | 2  | 2  | 3  | 12.70% |
| Aconitate hydratase                                                        | ACON                                                        | 85,465.90  | 10 | 11 | 18 | 14.50% |
| Heat shock protein HSP 90-<br>alpha                                        | HS90A, Q3UIF3                                               | 84,819.20  | 1  | 1  | 7  | 7.09%  |
| Transketolase                                                              | TKT                                                         | 67,631.90  | 15 | 17 | 27 | 27.30% |
| Nicotinamide<br>phosphoribosyltransferase                                  | NAMPT                                                       | 55,447.60  | 2  | 2  | 3  | 4.68%  |
| Fatty acid-binding protein,<br>adipocyte                                   | FABP4                                                       | 14,649.90  | 6  | 8  | 64 | 71.20% |
| Fibulin-2                                                                  | FBLN2, Q3TGL4,<br>Q99K58                                    | 126,457.20 | 2  | 2  | 2  | 1.88%  |
| Uncharacterized protein                                                    | Q3TMC5                                                      | 57,181.70  | 3  | 3  | 3  | 6.99%  |
| 40S ribosomal protein S20                                                  | RS20                                                        | 13,373.00  | 2  | 2  | 2  | 19.30% |
| Triosephosphate isomerase                                                  | TPIS                                                        | 32,191.30  | 10 | 14 | 44 | 39.80% |
| Collagen alpha-1(I) chain                                                  | CO1A1                                                       | 138,032.70 | 2  | 2  | 2  | 2.34%  |
| Proteasome subunit alpha type-3                                            | PSA3, Q9DCD8                                                | 28,490.80  | 2  | 3  | 4  | 8.63%  |
| Myosin-9                                                                   | MYH9                                                        | 226,378.00 | 0  | 0  | 3  | 1.84%  |
| Proteasome subunit alpha type                                              | Q3TS44                                                      | 29,547.00  | 0  | 0  | 5  | 11.40% |
| Proteasome subunit beta type-4                                             | PSB4                                                        | 29,116.60  | 3  | 3  | 3  | 11.40% |
| Trypsin precursor                                                          | P00761.1                                                    | 24,409.30  | 3  | 4  | 38 | 17.30% |
| Uncharacterized protein                                                    | Q3UHS6, Q80TM2,<br>TLN1                                     | 272,130.80 | 0  | 0  | 2  | 0.91%  |
| Heat shock 70 kDa protein 1B                                               | HS71B, Q3TU85                                               | 70,177.80  | 1  | 1  | 6  | 6.23%  |
| Type VI collagen alpha 3 subunit                                           | O88493                                                      | 286,885.10 | 0  | 0  | 2  | 0.98%  |
| Perilipin-4                                                                | PLIN4                                                       | 139,411.70 | 2  | 2  | 2  | 1.43%  |
| Rpl12 protein                                                              | Q6DI58                                                      | 22,987.40  | 0  | 0  | 4  | 11.00% |
| Glutamine amidotransferase-like<br>class 1 domain-containing<br>protein 3A | GAL3A                                                       | 28,089.80  | 2  | 2  | 2  | 4.89%  |
| Proteasome subunit alpha type-6                                            | PSA6                                                        | 27,372.50  | 4  | 4  | 4  | 16.70% |
| AHNAK nucleoprotein<br>(desmoyokin)                                        | E9Q616                                                      | 604,257.10 | 4  | 4  | 9  | 1.93%  |
| Hexokinase-2                                                               | E9Q5B5, HXK2                                                | 99,215.80  | 1  | 1  | 2  | 2.14%  |
| Ribosomal protein S3                                                       | Q5YLW3, Q9CZP6                                              | 26,602.50  | 3  | 3  | 3  | 15.60% |
| Peroxisredoxin-5                                                           | PRDX5                                                       | 21,897.60  | 3  | 3  | 7  | 17.10% |

|                                                       |                                              |            |   |   |    |        |
|-------------------------------------------------------|----------------------------------------------|------------|---|---|----|--------|
| Keratin, type II cytoskeletal 2 epidermal             | P35908.1                                     | 65,866.40  | 3 | 3 | 6  | 7.75%  |
| 3-hydroxyisobutyrate dehydrogenase                    | 3HIDH, A0ZNJ2                                | 35,523.90  | 2 | 3 | 3  | 9.25%  |
| High mobility group protein HMGI-C                    | HMG2, Q6NSP9                                 | 11,818.90  | 2 | 2 | 2  | 33.30% |
| Ubiquitin-40S ribosomal protein S27a                  | RS27A                                        | 17,951.60  | 3 | 3 | 4  | 17.30% |
| Malate dehydrogenase                                  | MDHC                                         | 36,512.10  | 7 | 7 | 14 | 21.90% |
| 40S ribosomal protein S28                             | RS28                                         | 7,840.90   | 2 | 2 | 3  | 46.40% |
| Ahnak protein                                         | A0PJF4                                       | 164,567.80 | 0 | 0 | 2  | 1.79%  |
| Protein disulfide-isomerase A4                        | A0A0R4J0Z1, PDIA4                            | 72,371.70  | 8 | 8 | 9  | 12.50% |
| MCG11348                                              | Q58ET1, Q5EBG5, Q6P1A9, Q80UT7               | 30,474.80  | 1 | 1 | 7  | 19.20% |
| Aflatoxin B1 aldehyde reductase member 2              | ARK72                                        | 40,612.50  | 2 | 2 | 2  | 7.36%  |
| 60S ribosomal protein L27a                            | RL27A                                        | 16,605.40  | 2 | 2 | 3  | 8.78%  |
| T-complex protein 1 subunit theta                     | H3BL49, Q3UKQ2, Q6A0F1, Q8BVY8, Q9WVS5, TCPQ | 59,557.10  | 6 | 6 | 7  | 16.00% |
| Sorbin and SH3 domain-containing protein 1            | SRBS1                                        | 143,073.90 | 0 | 0 | 2  | 2.17%  |
| Transaldolase                                         | A0A1B0GR11, TALDO                            | 42,152.70  | 6 | 6 | 7  | 18.10% |
| Uncharacterized protein                               | Q3UJS0, RL8                                  | 28,066.90  | 4 | 5 | 6  | 14.00% |
| Acyl-coenzyme A thioesterase 2                        | ACOT2                                        | 49,658.00  | 1 | 1 | 3  | 4.64%  |
| Twinfilin-1                                           | TWF1                                         | 40,080.60  | 2 | 2 | 2  | 6.00%  |
| Serine hydroxymethyltransferase                       | GLYM                                         | 55,760.20  | 2 | 2 | 3  | 4.17%  |
| Bifunctional purine biosynthesis protein PURH         | PUR9                                         | 64,217.60  | 4 | 4 | 4  | 8.95%  |
| Peroxiredoxin-1                                       | PRDX1                                        | 22,177.50  | 4 | 4 | 9  | 24.60% |
| Cytochrome c oxidase subunit 5A                       | COX5A                                        | 16,101.90  | 2 | 4 | 5  | 6.85%  |
| Clathrin heavy chain 1                                | CLH1, Q5SXR6, Q80U89                         | 191,990.50 | 3 | 3 | 3  | 2.27%  |
| Proteasome subunit beta type-5                        | PSB5                                         | 28,533.00  | 2 | 2 | 2  | 10.20% |
| Fumarylacetoacetase                                   | FAAA                                         | 46,176.60  | 3 | 3 | 5  | 7.40%  |
| Succinate--CoA ligase [ADP/GDP-forming] subunit alpha | SUCA                                         | 36,155.20  | 2 | 2 | 3  | 6.94%  |
| Histidine triad nucleotide-binding protein 1          | HINT1                                        | 13,777.20  | 2 | 2 | 2  | 18.30% |
| Cytosol aminopeptidase                                | AMPL                                         | 56,142.70  | 2 | 3 | 3  | 5.01%  |
| RAS oncogene family protein                           | A0A068BFR3, Q78ZJ8                           | 24,489.00  | 2 | 2 | 2  | 10.10% |
| ATP synthase subunit alpha                            | ATPA                                         | 59,754.10  | 5 | 5 | 7  | 12.80% |
| 60S ribosomal protein L26                             | B1ARA3, Q4FZH2                               | 12,217.10  | 2 | 2 | 2  | 22.30% |
| 40S ribosomal protein S3a                             | Q3U5P8, Q3UAC2, Q3UJU5, RS3A                 | 29,943.30  | 2 | 2 | 2  | 7.95%  |
| Histone H2B type 3-A                                  | H2B3A, H2B3B                                 | 13,994.70  | 0 | 0 | 20 | 17.50% |

|                                                           |                                                                           |            |   |    |    |        |
|-----------------------------------------------------------|---------------------------------------------------------------------------|------------|---|----|----|--------|
| Plasminogen activator inhibitor 1 RNA-binding protein     | A0A0N4SV32, PAIRB, Q3UEI6, Q3UJK2, Q3UMP4, Q3V274                         | 42,914.50  | 2 | 2  | 2  | 8.56%  |
| 40S ribosomal protein S16                                 | RS16                                                                      | 16,445.90  | 3 | 3  | 3  | 21.90% |
| Peptidyl-prolyl cis-trans isomerase                       | Q3TE63, Q3UAJ1, Q5SVY2                                                    | 17,943.80  | 8 | 13 | 39 | 46.30% |
| Myosin light polypeptide 6                                | A0A1W2P6F6, A0A1W2P6G5, A0A1W2P7Q9, MYL6, Q642K0                          | 15,448.00  | 2 | 2  | 2  | 17.10% |
| Citrate synthase                                          | CISY                                                                      | 51,738.10  | 1 | 2  | 12 | 9.70%  |
| Heterogeneous nuclear ribonucleoprotein H2                | HNRH2                                                                     | 49,280.00  | 0 | 0  | 3  | 7.35%  |
| Succinyl-CoA:3-ketoacid-coenzyme A transferase            | Q3UK61, SCOT1                                                             | 56,018.20  | 0 | 0  | 8  | 6.35%  |
| Far upstream element-binding protein 1                    | A0A0G2JFY5, A0A0G2JG00, A0A0G2JGW9, FUBP1, Q0P6B2, Q3TIS5, Q3TUE1, Q3UUU2 | 54,845.40  | 2 | 2  | 2  | 4.74%  |
| Enolase 1, alpha non-neuron                               | Q5FW97                                                                    | 47,141.70  | 2 | 2  | 15 | 21.40% |
| Glutathione S-transferase omega-1                         | GSTO1                                                                     | 27,498.60  | 3 | 3  | 6  | 15.40% |
| Moesin                                                    | MOES                                                                      | 67,768.80  | 3 | 3  | 5  | 10.20% |
| Uncharacterized protein                                   | Q3TH46, Q3U111                                                            | 77,465.30  | 0 | 0  | 2  | 3.35%  |
| Superoxide dismutase [Cu-Zn]                              | SODC                                                                      | 15,941.90  | 1 | 1  | 5  | 17.50% |
| Aldose reductase-related protein 2                        | ALD2                                                                      | 36,121.30  | 2 | 2  | 2  | 6.01%  |
| Heterogeneous nuclear ribonucleoprotein L                 | G5E924                                                                    | 66,932.80  | 2 | 2  | 2  | 4.39%  |
| Alanine aminotransferase 1                                | ALAT1                                                                     | 55,142.70  | 2 | 2  | 2  | 3.23%  |
| Glucose-6-phosphate 1-dehydrogenase                       | Q3TNL1, Q790Y8                                                            | 59,264.60  | 3 | 3  | 3  | 5.83%  |
| Succinate dehydrogenase [ubiquinone] flavoprotein subunit | SDHA                                                                      | 72,585.60  | 5 | 6  | 6  | 8.43%  |
| Elongation factor 2                                       | EF2, Q3TW58, Q3UBL9, Q3UDC8, Q3UMI7, Q6P9L9, Q8BMA8, Q8C153               | 95,260.00  | 5 | 6  | 15 | 10.70% |
| Histone H2B type 1-C/E/G                                  | H2B1C, H2B1F, H2B1H                                                       | 13,920.70  | 0 | 0  | 20 | 17.50% |
| Uncharacterized protein                                   | Q3TK29, Q3TSG8, Q3UPJ8, Q922R9, Q922Z3, TRAP1                             | 80,197.40  | 1 | 1  | 4  | 3.54%  |
| Cofilin-1                                                 | F8WGL3, Q544Y7, Q9CX22                                                    | 24,577.10  | 1 | 1  | 8  | 14.50% |
| Filamin, alpha                                            | B7FAU9, B7FAV1, B9EKP5, FLNA                                              | 280,491.70 | 5 | 5  | 6  | 2.84%  |
| Peroxiredoxin-2                                           | PRDX2                                                                     | 21,779.10  | 1 | 3  | 8  | 14.60% |
| 60S ribosomal protein L13                                 | RL13                                                                      | 24,306.40  | 2 | 2  | 4  | 10.90% |
| Methylcrotonoyl-CoA carboxylase beta chain                | MCCB                                                                      | 61,380.00  | 2 | 2  | 3  | 3.91%  |
| L-lactate dehydrogenase                                   | A0A1B0GSR9, A0A1B0GSX0, LDHA,                                             | 34,599.60  | 4 | 4  | 12 | 21.30% |



|                                                                                |                                                                        |            |   |    |    |        |
|--------------------------------------------------------------------------------|------------------------------------------------------------------------|------------|---|----|----|--------|
|                                                                                | Q3TCI7, Q3THB4,<br>Q3TI99, Q3UDU4,<br>Q99K20                           |            |   |    |    |        |
| Tubulin alpha chain                                                            | Q3TIZ0, Q52L87,<br>TBA1A, TBA1B                                        | 50,135.70  | 2 | 2  | 13 | 16.70% |
| Beta-actin-like protein 2                                                      | ACTBL                                                                  | 42,005.10  | 1 | 1  | 8  | 14.40% |
| Ran-specific GTPase-activating protein                                         | H7BX22, RANG                                                           | 17,888.10  | 3 | 3  | 3  | 21.60% |
| Uncharacterized protein                                                        | Q3TGJ9, Q6PAC1                                                         | 80,848.80  | 5 | 6  | 11 | 8.62%  |
| Galectin-1                                                                     | LEG1                                                                   | 14,866.10  | 2 | 2  | 5  | 20.00% |
| UPF0160 protein MYG1                                                           | MYG1                                                                   | 42,722.50  | 1 | 1  | 3  | 8.95%  |
| Citramalyl-CoA lyase                                                           | CLYBL                                                                  | 37,549.10  | 2 | 2  | 2  | 6.51%  |
| Pyruvate kinase PKM                                                            | KPYM                                                                   | 57,845.60  | 2 | 2  | 17 | 15.60% |
| Transitional endoplasmic reticulum ATPase                                      | TERA                                                                   | 89,324.80  | 4 | 5  | 8  | 7.20%  |
| 40S ribosomal protein S25                                                      | A0A1L1SQA8, RS25                                                       | 10,309.70  | 2 | 2  | 5  | 20.40% |
| V-type proton ATPase catalytic subunit A                                       | VATA                                                                   | 68,327.40  | 2 | 2  | 2  | 3.89%  |
| Heat shock protein 84b                                                         | Q71LX8                                                                 | 83,284.30  | 5 | 5  | 18 | 17.70% |
| Protein disulfide-isomerase                                                    | PDIA1, Q3TF72,<br>Q3THC3, Q3TIM0,<br>Q3TWE3, Q3U738,<br>Q3UBY9, Q3UDR2 | 57,090.60  | 3 | 3  | 3  | 5.70%  |
| Uncharacterized protein                                                        | Q3U292                                                                 | 22,083.10  | 1 | 1  | 6  | 16.70% |
| Poly(rC)-binding protein 2                                                     | A0A2R8VHP9,<br>A0A2R8VI25,<br>B2M1R7, PCBP2,<br>Q3TT81                 | 33,300.00  | 1 | 1  | 5  | 12.50% |
| Hydroxysteroid dehydrogenase-like protein 2                                    | HSDL2                                                                  | 54,209.30  | 1 | 1  | 2  | 4.49%  |
| N-acetylglucosamine kinase                                                     | Q3U2G9, Q9D997                                                         | 39,347.60  | 2 | 2  | 2  | 3.50%  |
| ATP synthase subunit beta                                                      | ATPB                                                                   | 56,301.20  | 5 | 5  | 5  | 12.90% |
| MCG132477                                                                      | Q58EW0, Q642K1                                                         | 21,644.50  | 2 | 2  | 5  | 13.80% |
| Mammalian ependymin-related protein 1                                          | EPDR1                                                                  | 25,485.00  | 2 | 2  | 2  | 10.30% |
| Uncharacterized protein                                                        | Q3UA53                                                                 | 32,666.60  | 2 | 2  | 6  | 6.57%  |
| Dihydrolipoamide acetyltransferase component of pyruvate dehydrogenase complex | Q7TND9                                                                 | 53,262.00  | 2 | 2  | 3  | 4.15%  |
| Eukaryotic translation initiation factor 2 subunit 1                           | IF2A, Q9CV24                                                           | 17,139.40  | 2 | 2  | 2  | 6.98%  |
| Uncharacterized protein                                                        | Q3TQP7, THIL                                                           | 44,802.30  | 3 | 3  | 6  | 9.91%  |
| Isocitrate dehydrogenase [NADP]                                                | IDHC, Q5HZJ8,<br>Q8C338                                                | 46,675.80  | 1 | 3  | 8  | 9.90%  |
| Actin                                                                          | ACTG, B2RRX1,<br>Q3UAF6, Q3UAF7                                        | 41,811.90  | 1 | 2  | 47 | 33.90% |
| Uncharacterized protein                                                        | Q8C5C0                                                                 | 64,005.50  | 2 | 2  | 2  | 4.17%  |
| Uncharacterized protein                                                        | Q3TK12, Q8BT90,<br>RS17                                                | 16,141.10  | 2 | 2  | 2  | 14.10% |
| Uncharacterized protein                                                        | A0A1S6GWH5                                                             | 124,238.30 | 8 | 11 | 13 | 8.77%  |

|                                              |                            |            |   |   |    |        |
|----------------------------------------------|----------------------------|------------|---|---|----|--------|
| Far upstream element-binding protein 2       | FUBP2                      | 76,775.20  | 5 | 5 | 5  | 8.02%  |
| Pgm2 protein                                 | Q66JR7, Q7TNU0             | 63,456.40  | 1 | 1 | 3  | 6.27%  |
| 2-iminobutanoate/2-iminopropanoate deaminase | RIDA                       | 14,255.50  | 2 | 2 | 2  | 15.60% |
| Talin-2                                      | A0A1L1SQ51, B2RY15, E9PUM4 | 271,925.00 | 0 | 0 | 2  | 0.90%  |
| Methanethiol oxidase                         | SBP1                       | 52,515.00  | 3 | 3 | 5  | 6.57%  |
| Adenylate kinase 2                           | KAD2                       | 26,469.90  | 6 | 7 | 20 | 36.80% |

## Mass spectrometry methods

3T3-L1 adipocytes were incubated in KRH buffer (116 mM NaCl, 4 mM KCl, 1mM MgCl<sub>2</sub>, 1.8 mM CaCl<sub>2</sub>, 25 mM Glucose, 10 mM HEPES, pH to 7.4) with bead conjugated BSA. For this, fatty acid free BSA (Sigma) was coupled to NHS-activated Sepharose 4 fast flow (GE Healthcare) by dissolving 250 mg BSA into 5 ml coupling buffer (0.2M NaHCO<sub>3</sub>, 0.5M NaCl pH 8.3), acidifying the resin with 1 mM HCl and incubated 16 hours at 4°C to allow coupling. The BSA-resin was blocked in 0.5M ethanolamine, 0.5M NaCl (pH 8.3) for 4 hours at 4°C. The BSA-resin was then washed 4 times with alternating high pH buffer (0.1M Tris; pH 8.5) and low pH buffer (0.1M sodium acetate, 0.5M NaCl; pH 4.5). The BSA beads were put into 5 ml KRH buffer and protein content determined by BCA protein assay. The adipocytes were incubated in KRH with 70 µM bead conjugated BSA and the cells were treated with forskolin, the media recovered, and the beads removed via microcentrifugation.

A 100 ug aliquot of secreted material was proteolytically digested in-solution with trypsin, cleaned on an Oasis C18 SPE cartridge (Waters, Corporation, Milford, MA), and fractionated offline by high pH C18 reversed-phase (RP) chromatography (33). The samples were concatenated and run on a Thermo Fisher Orbitrap Fusion instrument (Thermo Scientific Inc., Waltham, MA). The data was analyzed using the Sequest algorithm (34) in Proteome Discoverer 2.2.0.388 (Thermo Fisher Scientific, San Jose, CA). Scaffold (version 4.8.4, Proteome Software Inc., Portland, OR) was used to validate MS/MS with the FDR set less than 1.0%
